# Supplementary material for: Genome-Wide Association Study (GWAS) For Cold Tolerance at The Bud Burst Stage in Rice Using SNP Markers
Source: Research Square preprint supplement (doi:10.21203/rs.3.rs-311085/v1), 2021-03-18
Supplement: Supplementary file 1 [file d615f0c914003fee501b43df.xls]

## Sheet: Sheet1
	Table S1 Geographical distribution and indica or japanica type of 211 rice varieties
	ID#	Province	Longitude	Latitude	Subspecies
	JX002	Jiangxi	115	27	indica
	JX003	Jiangxi	115	27	indica
	JX004	Jiangxi	115	27	indica
	JX006	Guangdong	113	22.5	indica
	JX007	Guangdong	113	22.5	indica
	JX008	Guangdong	113	22.5	indica
	JX009	Guangdong	113	22.5	indica
	JX010	Guangdong	113	22.5	indica
	JX011	Guangdong	113	22.5	indica
	JX012	Guangdong	113	22.5	indica
	JX013	Guangdong	113	22.5	indica
	JX014	Guangdong	113	22.5	indica
	JX015	Guangdong	113	22.5	indica
	JX016	Guangdong	113	22.5	indica
	JX017	Guangdong	113	22.5	indica
	JX018	Guangdong	113	22.5	indica
	JX019	Guangdong	113	22.5	indica
	JX020	Guangdong	113	22.5	indica
	JX021	Jiangxi	115	27	indica
	JX022	Jiangxi	115	27	indica
	JX024	Jiangxi	115	27	indica
	JX025	Guangxi	108	23	indica
	JX026	Jiangxi	115	27	indica
	JX027	Hubei	112	31	indica
	JX028	Zhejiang	120.5	29	indica
	JX029	Hunan	111	27	indica
	JX030	Jiangxi	115	27	indica
	JX031	Jiangxi	115	27	indica
	JX032	Jiangxi	115	27	indica
	JX033	Jiangxi	115	27	indica
	JX034	Jiangxi	115	27	indica
	JX036	Jiangxi	115	27	indica
	JX037	Jiangxi	115	27	indica
	JX038	Jiangxi	115	27	indica
	JX040	Jiangxi	115	27	indica
	JX041	Jiangxi	115	27	indica
	JX042	Jiangxi	115	27	indica
	JX044	Jiangxi	115	27	indica
	JX045	Guangdong	113	22.5	indica
	JX048	Jiangxi	115	27	indica
	JX049	Philippines	120	15	indica
	JX050	Guangxi	108	23	indica
	JX053	Jiangxi	115	27	indica
	JX054	Jiangxi	115	27	indica
	JX055	Jiangxi	115	27	indica
	JX056	Jiangxi	115	27	indica
	JX057	Jiangxi	115	27	indica
	JX058	Jiangxi	115	27	indica
	JX059	Hubei	112	31	indica
	JX060	Jiangxi	115	27	indica
	JX061	Jiangxi	115	27	indica
	JX063	Jiangxi	115	27	indica
	JX064	Jiangxi	115	27	indica
	JX065	Jiangxi	115	27	indica
	JX066	Guangdong	113	22.5	indica
	JX067	Jiangxi	115	27	indica
	JX069	Jiangxi	115	27	indica
	JX070	Jiangxi	115	27	indica
	JX072	Jiangxi	115	27	indica
	JX074	Sichuan	102.5	30	japonica
	JX075	Heilongjiang	128	48	japonica
	JX076	Beijing	116	39	japonica
	JX077	Heilongjiang	128	48	japonica
	JX078	Heilongjiang	128	48	japonica
	JX079	Jiangxi	115	27	indica
	JX080	Jiangxi	115	27	indica
	JX081	Hubei	112	31	indica
	JX082	Hubei	112	31	indica
	JX083	Hubei	112	31	indica
	JX084	Hubei	112	31	indica
	JX085	Hubei	112	31	indica
	JX086	Hubei	112	31	indica
	JX090	Hubei	112	31	indica
	JX092	Hubei	112	31	indica
	JX093	Hubei	112	31	indica
	JX094	Sichuan	102.5	30	indica
	JX096	Jiangxi	115	27	indica
	JX098	Jiangxi	115	27	indica
	JX099	Jiangxi	115	27	indica
	JX101	Jiangxi	115	27	indica
	JX102	Jiangxi	115	27	indica
	JX106	Jiangxi	115	27	indica
	JX107	Jiangxi	115	27	indica
	JX109	Jiangxi	115	27	indica
	JX110	Zhejiang	120.5	29	indica
	JX112	Jiangxi	115	27	indica
	JX113	Jiangxi	115	27	indica
	JX114	Jiangxi	115	27	indica
	JX115	Jiangxi	115	27	indica
	JX116	Jiangxi	115	27	indica
	JX117	Jiangxi	115	27	indica
	JX118	Jiangxi	115	27	indica
	JX119	Jiangxi	115	27	indica
	JX120	Jiangxi	115	27	indica
	JX121	Hubei	112	31	indica
	JX122	Zhejiang	120.5	29	indica
	JX123	Guangxi	108	23	indica
	JX124	Sichuan	102.5	30	indica
	JX125	Guangxi	108	23	indica
	JX126	Guangxi	108	23	indica
	JX127	Guangxi	108	23	indica
	JX128	Guangxi	108	23	indica
	JX129	Guangxi	108	23	indica
	JX130	Guangxi	108	23	indica
	JX131	Guangxi	108	23	indica
	JX132	Guangxi	108	23	indica
	JX133	Guangxi	108	23	indica
	JX134	Guangxi	108	23	indica
	JX135	Guangxi	108	23	indica
	JX136	Guangxi	108	23	indica
	JX137	Guangxi	108	23	indica
	JX138	Guangxi	108	23	indica
	JX139	Guangxi	108	23	indica
	JX140	Guangxi	108	23	indica
	JX141	Guangxi	108	23	indica
	JX142	Guangxi	108	23	indica
	JX143	Guangxi	108	23	indica
	JX144	Guangxi	108	23	indica
	JX145	Guangxi	108	23	indica
	JX146	Guangxi	108	23	indica
	JX147	Guangxi	108	23	indica
	JX148	Guangxi	108	23	indica
	JX149	Guangxi	108	23	indica
	JX150	Guangxi	108	23	indica
	JX151	Guangxi	108	23	indica
	JX152	Guangxi	108	23	indica
	JX153	Guangxi	108	23	indica
	JX154	Guangxi	108	23	indica
	JX155	Guangxi	108	23	indica
	JX156	Guangxi	108	23	indica
	JX157	Guangxi	108	23	indica
	JX158	Guangxi	108	23	indica
	JX159	Guangxi	108	23	indica
	JX160	Guangxi	108	23	indica
	JX161	Guangxi	108	23	indica
	JX162	Guangxi	108	23	indica
	JX163	Jiangsu	118.5	32.5	japonica
	JX164	Tianjin	117	39	japonica
	JX165	Anhui	116.5	31.5	japonica
	JX166	Tianjin	117	39	japonica
	JX167	Beijing	116	39	japonica
	JX168	Jiangsu	118.5	32.5	japonica
	JX169	Henan	113	33.5	japonica
	JX170	Tianjin	117	39	japonica
	JX171	Henan	113	33.5	japonica
	JX172	Henan	113	33.5	japonica
	JX173	Anhui	116.5	31.5	japonica
	JX174	Anhui	116.5	31.5	japonica
	JX175	Jiangsu	118.5	32.5	japonica
	JX176	Liaoning	121.5	40.5	japonica
	JX177	Henan	113	33.5	japonica
	JX178	Shangdong	118	36	japonica
	JX179	Jiangsu	118.5	32.5	japonica
	JX180	Jiangsu	118.5	32.5	japonica
	JX181	Jiangsu	118.5	32.5	japonica
	JX182	Jiangsu	118.5	32.5	japonica
	JX183	Tianjin	117	39	japonica
	JX184	Jiangsu	118.5	32.5	japonica
	JX185	Jiangsu	118.5	32.5	japonica
	JX186	Jiangsu	118.5	32.5	japonica
	JX187	Jiangsu	118.5	32.5	japonica
	JX188	Jiangsu	118.5	32.5	japonica
	JX189	Jiangsu	118.5	32.5	japonica
	JX190	Jiangsu	118.5	32.5	japonica
	JX191	Jiangsu	118.5	32.5	japonica
	JX192	Jiangsu	118.5	32.5	japonica
	JX193	Jiangsu	118.5	32.5	japonica
	JX194	Jiangsu	118.5	32.5	japonica
	JX195	Jiangsu	118.5	32.5	japonica
	JX196	Jiangsu	118.5	32.5	japonica
	JX197	Jiangsu	118.5	32.5	japonica
	JX198	Jiangsu	118.5	32.5	japonica
	JX199	Zhejiang	120.5	29	japonica
	JX200	Jiangsu	118.5	32.5	japonica
	JX201	Jiangsu	118.5	32.5	japonica
	JX202	Henan	113	33.5	japonica
	JX203	Jiangsu	118.5	32.5	japonica
	JX204	Shangdong	118	36	japonica
	JX205	Tianjin	117	39	japonica
	JX206	Liaoning	121.5	40.5	japonica
	JX207	Liaoning	121.5	40.5	japonica
	JX208	Liaoning	121.5	40.5	japonica
	JX209	Jiangsu	118.5	32.5	japonica
	JX210	Jiangsu	118.5	32.5	japonica
	JX211	Liaoning	121.5	40.5	japonica
	JX212	Liaoning	121.5	40.5	japonica
	JX213	Jiangsu	118.5	32.5	japonica
	JX214	Jiangsu	118.5	32.5	japonica
	JX215	Tianjin	117	39	japonica
	JX216	Jiangsu	118.5	32.5	japonica
	JX217	Liaoning	121.5	40.5	japonica
	JX218	Liaoning	121.5	40.5	japonica
	JX219	Liaoning	121.5	40.5	japonica
	JX220	Liaoning	121.5	40.5	japonica
	JX222	Tianjin	117	39	japonica
	JX223	Jiangsu	118.5	32.5	japonica
	JX224	Liaoning	121.5	40.5	japonica
	JX225	Tianjin	117	39	japonica
	JX226	Jiangsu	118.5	32.5	japonica
	JX227	Tianjin	117	39	japonica
	JX228	Jiangsu	118.5	32.5	japonica
	JX229	Jiangsu	118.5	32.5	japonica
	JX230	Liaoning	121.5	40.5	japonica
	JX231	Liaoning	121.5	40.5	japonica
	JX232	Liaoning	121.5	40.5	japonica
	JX233	Henan	113	33.5	japonica
	JX234	Jiangsu	118.5	32.5	japonica
	JX236	Jiangsu	118.5	32.5	indica
	JX237	Japan	137.5	37.5	japonica
	JX238	Japan	137.5	37.5	japonica
	JX239	Japan	137.5	37.5	indica
